# Supplementary material for: Structure of O-Antigen and Hybrid Biosynthetic Locus in Burkholderia cenocepacia Clonal Variants Recovered from a Cystic Fibrosis Patient
Source: PubMed Central journal article supplement (PMC5462993; doi:10.3389/fmicb.2017.01027), 2017-06-08
Supplement: Image_1.pdf [file Image_1.pdf]

## *Supplementary Material*

### **Structure of O-antigen and hybrid biosynthetic locus in *Burkholderia cenocepacia* clonal variants recovered from a cystic fibrosis patient**

**A. Amir Hassan<sup>1§</sup>, Rita F. Maldonado<sup>1§</sup>, Sandra C. dos Santos<sup>1§</sup>, Flaviana Di Lorenzo<sup>2§</sup>, Alba Silipo<sup>2</sup>, Carla P. Coutinho<sup>1</sup>, Vaughn S. Cooper<sup>4</sup>, Antonio Molinaro<sup>2</sup>, Miguel Valvano<sup>3</sup> and Isabel Sá-Correia<sup>1\*</sup>**

\* **Correspondence:** Professor Isabel Sá-Correia: [isacorreia@tecnico.ulisboa.pt](mailto:isacorreia@tecnico.ulisboa.pt)

§ These authors contributed equally to this work

**Supplementary Figures:**

Figure S1

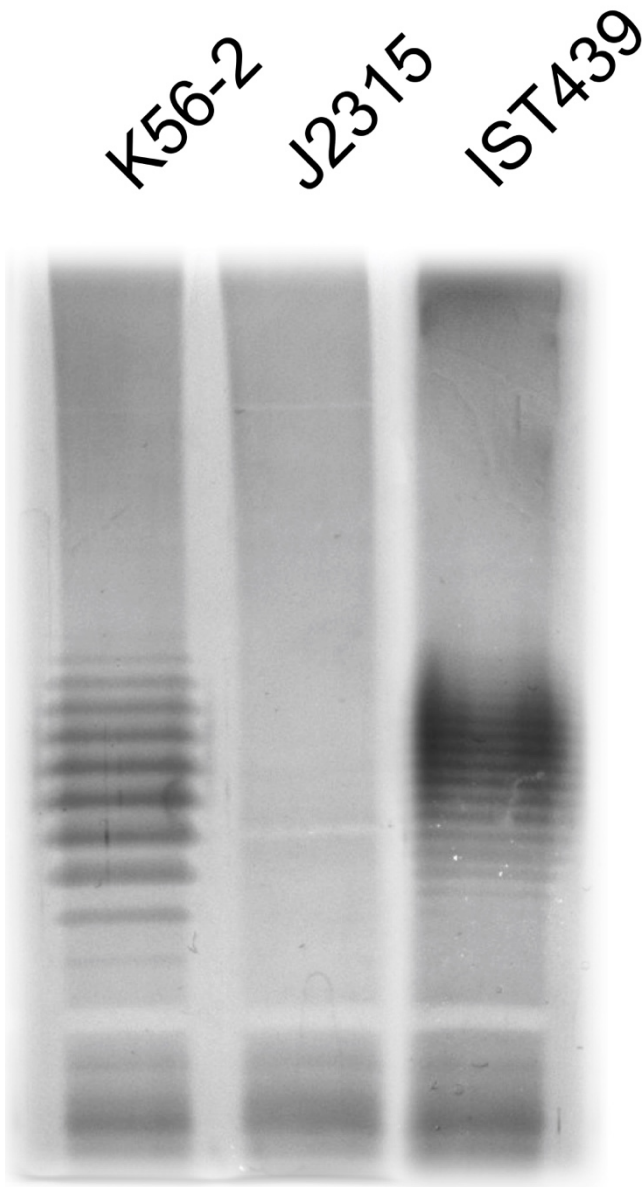

**Figure S1:** Electrophoretic profiles of the LPS extracted from *Burkholderia cenocepacia* IST439 isolate and the (*recA* lineage IIIA) ET-12 reference strains K56-2 and J2315. LPS loading was standardized based on culture optical density. Samples were run in 14% polyacrylamide gels in a Tricine-SDS system and developed by silver staining.
