# Supplementary material for: Structure of O-Antigen and Hybrid Biosynthetic Locus in Burkholderia cenocepacia Clonal Variants Recovered from a Cystic Fibrosis Patient
Source: PubMed Central journal article supplement (PMC5462993; doi:10.3389/fmicb.2017.01027), 2017-06-08
Supplement: Image_2.pdf [file Image_2.pdf]

Supplementary Material

Structure of O-antigen and hybrid biosynthetic locus in *Burkholderia cenocepacia* clonal variants recovered from a cystic fibrosis patient

A. Amir Hassan<sup>1§</sup>, Rita F. Maldonado<sup>1§</sup>, Sandra C. dos Santos<sup>1§</sup>, Flaviana Di Lorenzo<sup>2§</sup>, Alba Silipo<sup>2</sup>, Carla P. Coutinho<sup>1</sup>, Vaughn S. Cooper<sup>4</sup>, Antonio Molinaro<sup>2</sup>, Miguel Valvano<sup>3</sup> and Isabel Sá-Correia<sup>1\*</sup>

\* Correspondence: Professor Isabel Sá-Correia: [isacorreia@tecnico.ulisboa.pt](mailto:isacorreia@tecnico.ulisboa.pt)

§ These authors contributed equally to this work

Supplementary Figures:

Figure S2

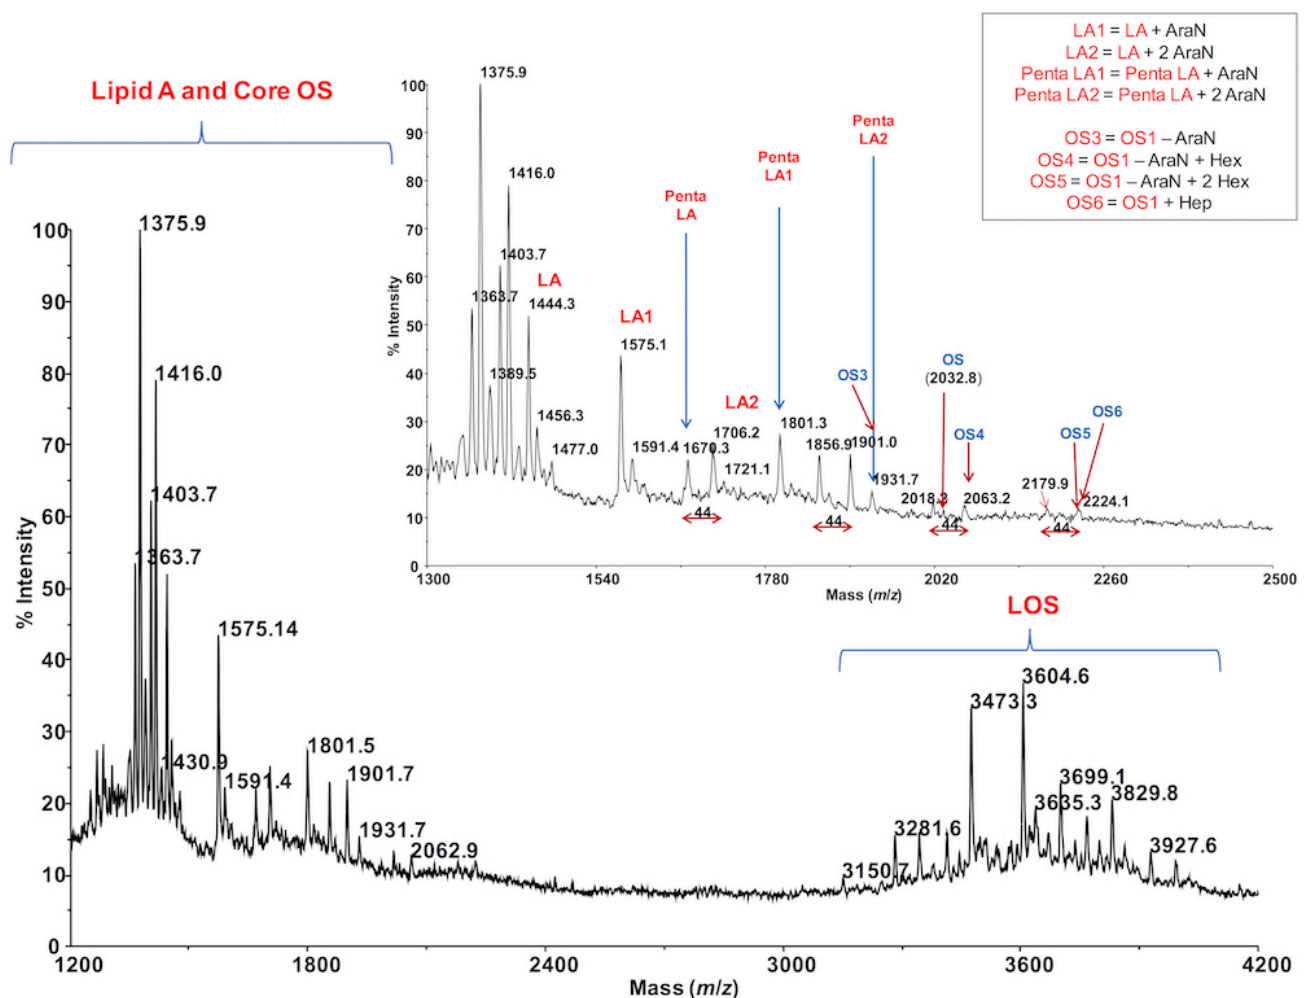

**Figure S2:** The MALDI mass spectrum of the intact IST4113 LPS (mass range 1200-420000 Da). In the inset, the magnification of the mass-region 1300-2500 Da is also shown.
