# Supplementary material for: Structure of O-Antigen and Hybrid Biosynthetic Locus in Burkholderia cenocepacia Clonal Variants Recovered from a Cystic Fibrosis Patient
Source: PubMed Central journal article supplement (PMC5462993; doi:10.3389/fmicb.2017.01027), 2017-06-08
Supplement: Image_4.pdf [file Image_4.pdf]

## *Supplementary Material*

### **Structure of O-antigen and hybrid biosynthetic locus in *Burkholderia cenocepacia* clonal variants recovered from a cystic fibrosis patient**

**A. Amir Hassan<sup>1§</sup>, Rita F. Maldonado<sup>1§</sup>, Sandra C. dos Santos<sup>1§</sup>, Flaviana Di Lorenzo<sup>2§</sup>, Alba Silipo<sup>2</sup>, Carla P. Coutinho<sup>1</sup>, Vaughn S. Cooper<sup>4</sup>, Antonio Molinaro<sup>2</sup>, Miguel Valvano<sup>3</sup> and Isabel Sá-Correia<sup>1\*</sup>**

\* **Correspondence:** Professor Isabel Sá-Correia: [isacorreia@tecnico.ulisboa.pt](mailto:isacorreia@tecnico.ulisboa.pt)

§ These authors contributed equally to this work

## Supplementary Figures:

Figure S4

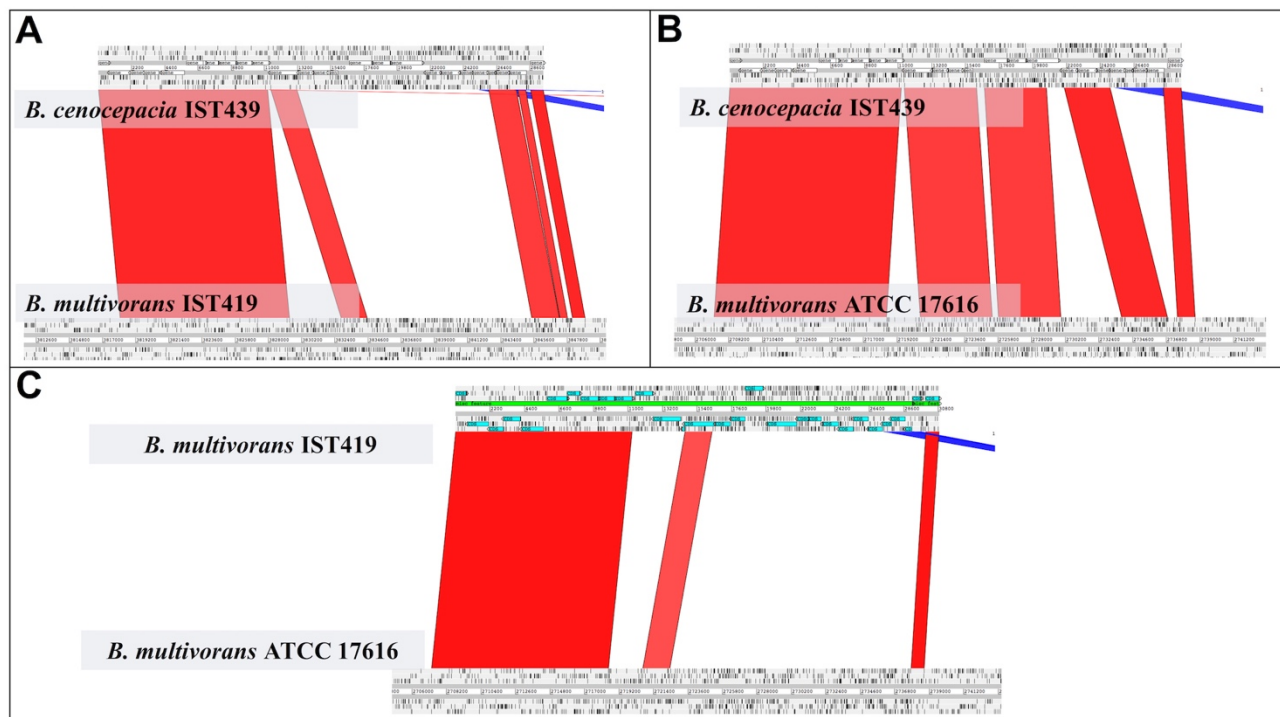

**Figure S4:** Comparative visualization of the OAg biosynthetic clusters in binary mode between *B. cenocepacia* IST439 and *B. multivorans* IST419 (A), between *B. cenocepacia* IST439 and *B. multivorans* ATCC 17616 (B), and between *B. multivorans* isolates IST419 and ATCC 17616 (C) are shown.
