# Supplementary material for: Structure of O-Antigen and Hybrid Biosynthetic Locus in Burkholderia cenocepacia Clonal Variants Recovered from a Cystic Fibrosis Patient
Source: PubMed Central journal article supplement (PMC5462993; doi:10.3389/fmicb.2017.01027), 2017-06-08
Supplement: Table_1.pdf [file Table_1.pdf]

*Supplementary Material*

**Structure of O-antigen and hybrid biosynthetic locus in *Burkholderia cenocepacia* clonal variants recovered from a cystic fibrosis patient**

**A. Amir Hassan<sup>1§</sup>, Rita F. Maldonado<sup>1§</sup>, Sandra C. dos Santos<sup>1§</sup>, Flaviana Di Lorenzo<sup>2§</sup>, Alba Silipo<sup>2</sup>, Carla P. Coutinho<sup>1</sup>, Vaughn S. Cooper<sup>4</sup>, Antonio Molinaro<sup>2</sup>, Miguel Valvano<sup>3</sup> and Isabel Sá-Correia<sup>1\*</sup>**

\* **Correspondence:** Professor Isabel Sá-Correia: [isacorreia@tecnico.ulisboa.pt](mailto:isacorreia@tecnico.ulisboa.pt)

§ These authors contributed equally to this work

## 1 Supplementary Tables:

**Table S1:** The sequence of the OAg cluster of *B. cenocepacia* IST439

>IST439\_01731 3-deoxy-D-manno-octulosonic-acid transferase

ATGCTGAGGGCGATCTATCGCGCGCTGTGGTGGCTCGTCGCGCCGGCCGCGGTCATCCGG  
 CTCTACGTGCGCTCGCGCAAGGAGCGCGGTTATCGCGAGCATATCGGCGAGCGCTTCGGT  
 CATGTCGCGGGCCGCTCGCGCGACGACCGCGCGCCGCTGATCTGGGTGCATGCGGTTGTCG  
 GTCGGCGAGACGCGCGCCGCGCAGCCGCTGATCGATGCGCTGATGCGCGCGCGCCCCGAT  
 GCGCGCATCCTGCTACGCACATGACGCCGAGCGGCCGCGCGACCGGGCAACAGATCTTC  
 GGCGATCGCGTGCTGCGCTGCTACCTGCCGTACGACATGCCGGGCGCGGTTGCGGGCGCTTC  
 CTGCGTGCATGGCGGCCGACGCTCGGCCTCGTGATGGAAACCGAGGTGTGGCCGACGCTG  
 ATCGACGAGTGTGCGCCGCGCGGACGTGCCGCTGGTGTGACCAATGCGCGGATGTCCGCG  
 CGTTCGTTCCGGCGCGCGGCGAAGTTCGGCGCGGGCGACGCGCGACGTGTTCCGGCGGCTTC  
 TCGCGCGTGCTCGCGCAGAGCCC GGCCGATGCGGAGCGGCTGACGTGCTCGGCGCCCGC  
 AACGTGACCGTGCTCGGCAACCTGAAGTTCGACATGACGACGCCGCCGGAACCTCGCGGCA  
 CGCGGCCATGCGTGGCGCGACGCGATCGGCCGCGCGGCCGGTGTGGGTGCGCCGCCAGCACG  
 CGCGAGAACGAAGAGGGCGCTGGTGTTCAGGCGTTCGCGGAAATGCGTACGCCCGGCGCG  
 CTGCTGGTGCTCGTGCCGCGTCATCCGCAGCGCTTCGCCGAGGTCGAGGCGCTCGTCGCG  
 CGCGGGCGGGCTCAAGTGCGTGC GGCGCTCGGTGTGGGCGGCCGATGCGGGCCGCGCTCGCA  
 GCGGGCCGGCCGGCGGCCGACCCGCTGCCGGACGACGTCACGGTGTTCGCTCGGCGATTTCG  
 ATGGGCGAGCTCGGCGCGTACTACGCGGGCGGCCGACATCGCGTTCATCGGCGGCAGCCTG  
 CTGCCGCTCGGCGGGCAGAACCTGATCGAAGCGTGC GCGGTCGGCGTGC CGGTGCTGATC  
 GGGCCGCACGTGTTCAACTTCACGCAGGCGACCGCCGATGCGGTGCGCGGCCGGTGC GGCG  
 ATGCAGGTGCGAGGATCCGCTCGATCTCGCACACGTGCTCGACGCGCTGTTCCGCCGACAAC  
 GCGCGGCGCATCGCGATGGGCGCGGCCGGCGCGGCCTTCGCATCGCGTCACCGCGGGCGCG  
 ACCGCGCGCACGGTGCAGCTGCTCGCCGCGCTGTTGCCGCCTGCCGCAACCGGCGCGCGT  
 GCGCTGCCGGACGTGCAGGACGCTCCGGGCGACGACGCATAG

>IST439\_01732 hypothetical protein

ATGAGCGAATCCCAGATCATCGAAGTCCCGTCCGCCGACTGGAGCGGACACAACCTGTCA  
 GCGCCGCGCGAGCAGTTGCTGGCCGCGGTCGAGGAAGGCAAGGTGCTGTATTTCCCGCAC  
 CTGCGCTTCGCGATCGAAGGCGGCGAGGAAGCGCTGCTCGATCCGGCGCTCGCCGATCCG

AAACGCAAGAACATCAGCCTCGCGCCGAACGGCGGCGCGCTCGCCGGCGTGCTCGGGCGAC  
AGCGTCACGCAGTCGGCCGTGCGCGCGCTCGTCGCGCGCTTCCAGCAGCAGGCCGGCACG  
CTCGTCGACGGCCTCTTTCCCGAATAACCGCGGCAAGCTGCGCGTTCGCGCCGACGAGCCTG  
CGGCTGATGCAGGTGCAAACGCGCCAGACGTCGTGGCGCAAGGACGACAGCCGGCTGCAC  
GTCGACGCGTTCCCGTCGCGGCCGAACACTACGGCGAGCGCATCCTGCGCGTGTTACGAAC  
GTGAACCCGGCCGGCGCGCCGCGCGTGTGGCGTGTTCGGCGAGCCGTTTCGAGGACGTCGCG  
AAGCGCTTCCTGCCGAAGATCCGGCCGACGTTCCCGGGCTCGGGCGTGGCTGCTGAACCTG  
CTGCACGTGACGAAATCGCCGCGCAGCGCATAACGACCATCTGATGCTGAACCTGCACGAC  
GGGATGAAGGCCGACCTCGACTACCAGAAGACGTGTCCGCAGCAAACGATGCCGTTTCCG  
CCGGGCAGCGTGTGGATATGTTTCTCCGATCAGACTTCGCACGCTGTGATGTCGGGCCAG  
TTCATGCTCGAGCAGACCTTCTTCTCGCCGGTCGACGCGATGGTTCGCCGCGAATGCGCG  
CCGCTCGGCATTCTCGAACGCCTGACGGGCAGGGCGCTGGTTTGA

>IST439\_01733 lipopolysaccharide heptosyltransferase I

GTGCAAAGATCCTGATCGTGCGTGTGTCGTCGCTGGGCGACGTCGTGCACAACATGCCG  
GTGATCGCCGATATCCGGCGCCGCCACCCCGATGCGCAGATCGACTGGCTCGTCGAGGAA  
AGCTTCGTCGACCTCGTACGGCTCGTCGACGGCGTGCGCAACGTGCTGCCGTTCTCGCTG  
CGCCGCTGGCGCAAGAAGCCGTTCTCGGGGGCCACGTGGCGCGAGATCCGCGCGTTCGCG  
CGGCGCCTCGCGGCCGAGCAGTACGACCTCGTGATCGACTGCCAGGGCCTCATCAAGACC  
GCGTGGGTGCGGAGCTGGGCCCGCGGCCCGCTCGTCGGGCTCGGCAACCGCACCGACGGC  
GCCGGCTACGAGTGGCCGGTGCCTTCTTCTACCGCAAGCGCGTGCCGATCGCGCCGCGC  
ACGCACGTGTCGAGCGCTCGCGCCAGTTGGTCGCGGCCGCGCTGGACGACCCGGCGCCA  
ACCCCGGCCGACCCCGTCGAGTTCGGCCTCGACACGCGGGCGGCAGCGCTCGCGGTGGCC  
GCGCTCGGCCTGAACTTGCCGGTGCCGTACGTGCTGTTTCGTCACGCGACGTCGCGCGCC  
GACAAGCAGTGGCCGGACGCCGCGTGGATCGAGCTCGGCCAGGCGCTGGTGCGGCGCGGC  
GCGTCGCTCGTGCTGCCGTGGGGCAACGACGCGGAACGCGCGACCAGCGAGCGGCTCGCG  
AAGGAATTCGGTGCGGCGGCGATCGTGCCGCCGAAGCTGTGCTGCTGCCGGCCGTGGTCGGG  
CTGATCGACGGCGCGGCCGCGACGGTCCGGGTTGATACAGGTCTGGTTCACATCGCGGCC  
GCGCTGAAGCGCCCGACGGTTCGAACTGTACAATTTTCGCGACGGCCTGGCGGACCGGCGGC  
TACTGGTCCCGAACGTCGTCAATCTCGGCACGGCGGGGCAGCCCCCGTCGATCGCGCAG  
GTGAAGTCGGCGCTCGCGGGCTTCGGCCTCCTGTAA

>IST439\_01734 phosphomannomutase

ATGATCTCCCAATCCATCTTCAAGGCATATGACATTCGTGGCGTGGTTCGGCAAGACCCTC  
GACGTCGACACGGCGCGCGGGATCGGCCGGGCATTCGGCAGCGAAGTGCCTGCGCAGGGC  
GGCGATGCGGTGCTGCTCGCGCGCGACGGCCGCTGTCCGGACCGGAGCTGGTTCGGCGCG

CTGGCCGACGGCCTGCGTGCGGCCGGGGTCGACGTCGTCGACGTCGGCATGGTGCCGACG  
CCGGTCGGTTATTTTCGCGGCGAACGTGCCGCTCGCGCTGAAGGGCGGGGAGCGCCGCGTC  
GATTCGTGCATCGTCGTCACGGGCAGCCACAACCCGCCCCGACTACAACGGCTTCAAGATG  
GTGCTGCGCGGCCGCCGAATCTACGGCGAGCAGATCCAGGCGCTGTACCGCCGCATCGTC  
GACGAGCGGTTTCGAGACGGGCAGCGGCACGTATGAAGCAATCGACGTCGCGGATCAGTAC  
ATCGCGCGCATCGTCGGCGACGTGAAGCTCGCGCGGCCGCTGAAGCTCGTCGTCGACGCC  
GGCAACGGCGTCGCGGGCCCCGCTCGCGACGCGCCTGTTCAAGGCGCTCGGCTGCGAACTC  
GTCGAGCGCTTACCGACATCGACGGCACGTTCCCGAATCACCACCCCGATCCCGCCCAC  
CCGAAAACCTGCAGGACGTGATCCAGGCGCTGAAGGACACCGATGCGGAGCTCGGCTTC  
GCGTTCGACGGCGACGGCGACCGTCTCGGCGTCGTCACGAAGGACGGCCAGATCATCTAT  
CCGGACCGCCAGCTGATGCTGTTTCGCGGAAGAAGTGCTGTCGCGCAATCCGGGGCGCCCAG  
ATCATCTACGACGTGAAGTGCACGCGCCACCTCGCGCAGTGGGTGAAGTGAAGGGCGGC  
GAGCCGCTGATGTGGAAGACCGGCCATTCGCTCGTGAAGGCGAAGCTGCGCGAGACGGGG  
GCACCGCTGGCCGGCGAAATGAGCGGCCACGTGTTCTTCAAGGATCGCTGGTACGGCTTC  
GACGACGGCCTGTACACGGGGCGCGCCTGCTGGAAATTCTCGCGAAGACGGCCGATCCG  
AGCGCGCTGCTCAACAGCCTGCCGGACGCGATGAGCACGCCGGAAGTGCAGCTCTGGCTC  
GACGAAGGCGAGAATTTCCGCCTGATCGAGCAGTTGCAGAAGGAAGCGAAGTTCGACGGC  
GCCGACGAAGTCGTGACGATCGACGGCCTGCGTGTCGAGTACCCGGACGGCTTCGGCCTC  
GCGCGTTCGTGGAACACGACGCCGGTTCGTGTCGTGATGCGCTTCGAAGCCGAGACGCAGGAA  
GGGCTCAAGCGCATCCAGGAGGACTTCCGCCGCGTGCTGACGGCCGCGAAGCCGGACGTC  
AAGCTGCCGTTCTGA

>IST439\_01735 membrane protein

ATGCTGAAGCGCTTCGGCAACCCGGACGTGCGGAAGGCCGTCGCGAACCTCGTCTGGCTG  
GGGCTCGAACGGCTCACCCAGATCGGGCGTCGCGATCGCGATCAGCGGCCTGCTGGCCCGT  
TATTTTCGGGCCAGATGTGTTTCGGCAAATGGCAGTATGCGAATACGCTTCTCCTGGTACTG  
GCGCCGCTCACCTGGGTGTGCGGGCGCGGAAATCCTCGTCCCGACCATCGTCCAGCGCCCG  
CCCGCGCAGCTCGGGCGCGGTGCTCGGCAGCGCGTTCGTGCTGCGCATCGCCGTGTCGGCC  
GCCGCGCTCGCCGCGACCTGGATCGCGATCGCCGCGGGCGCCTTCGACCCGCTGGTTCGGC  
GCGATGCTCGCGGGCCTCGCGGTACGATGGTGTTCCGCGAGCCGTTTCGTTCGGCGTGATC  
AACGCGTGGCTGCAGAGCATGACCTACAGCAAGCCGCAGCTCGTCACCAGCATGGTCACC  
GCGCTCGCCAAGGCGCTGCTCGTCTGGCTGCTGGTCCGCGCGGGCCCGGCCCGCCCGC  
TTCGCGTGGCTGTGGGCGCTGGAAGCCGCGCGATCGGCTTCGCGCTGCTGCTGTACTAC  
CGCCATCGTAACGGCGGTGCGCTCGGCTGGACGTTTCGACAAGCCGCTGTTCCGGCACTTT  
GCAACGGCCGGCACCGTGTTCTGGCTCGGCCTCATCTGCATGTACCTGTTCCCTGAAGCTC

GACCGCCTGATGCTCGAGCGCCACGTGTCGTTCCGCCGATCTCGGCCGCTATTCGGCCGCG  
CAGCAGCTCAACGAGAAGTGGATCACGCTCGCGCTGATGCTCGCGCAGACGATCGCGCCC  
GCCTTCGTCTACCGCGTGCAGGACGTGCGCGGGCTGCGCCGCAACATCGTCCGGCTGATC  
GCGATGACGGCCGGCCTGATGACGGCCGGCGCGCTCGTGCTCGACGCCGCCGCCCGCTG  
ATCGTCCGCAAGGTGTTCCGGCCGGCTACGAGGCGTCGGTCGACATCTTCCGCTGGGCC  
GTCTGGCTGTCCGTGCCGGCCGGCATCGAGGCGATAGGCAATCTTATCGTTCTCAAATAT  
CAAGCAAAATTTCGTGTTGCTGTCGAAATGGCTGCTCGCGCTGGCCATCGCCGCGATCGTC  
AACCTGTTCCGCGATCCCPCGGCTCGGCCTGTACGGCGCGCTCGTCCGGCTGGCGGCCGGC  
TACCTGGCCGCGGCCGCCGTCAACTTTTATTACATCCGTTTCAAGCTGCGAACATGA

>IST439\_01736 glycosyl transferase family protein

ATGACGTCCCCTGCTTGCCCCACCCCGCTCGACGACGTGGCCGTGCTGATGCCGGCCTAC  
AACGGGCACGACGACGTTCGTCGGACCCTCGCGTCGTTTCGCGAGGACGCGCCCGTGCAC  
GTGCTGATCGTCGACGACGGCAGCACGCCGCCGATCGTCGCGCCCGATCTGCCGGGCCTG  
TCGATCGACGTGCTGCGCATGCCCCGGAACGGCGGCATCGAACGCGCGCTGGCGGCCGGC  
ATCGACGCGCTCGCGGCGCGCGGCTTCCGCTACGCGGCCCGTATCGACGCCGGCGATCTC  
GCCGCGCCGACGCGCTCGCGAAGGAGCGCGCCTATCTCGGCGCCCACCCGCGCGTAGCC  
TGCGTCGGCATGTGGACGCAGGTTCGTGTCGCGCGCCGGCGAGCCGCGCTTCATGCTGACG  
CCGGCCGCCGATCCGCGCACGCTGCGCCGCACGCGCTTCTGCGCTCGCCGCTCGTGCAT  
CCGTCTGTGATGTTGCGCATCGACGCCGTGCGCGAAGTGGGCAACTATCGGGCAAAGTAC  
CGCGCGGCCGAGGATCTCGATCTTTTTTTTACGGTTAATGCAACGCTACGATTGCGCGAAC  
CTGCCGAACTCGGCCTGTATTACGAGCTTAACGAGGGCGGGATCAGCGCGACCAAACGC  
CGGCGCCAGCTGGTGTGACGCTCACGCTGCTGCTGCGCCACTTCAACGTGCTGAACCCG  
TACGACTGGGCCGGCCTCGCCAAGAACCTGCTGCATTTTCGTGACGCCGTACCGTACGCTG  
CAGCGCATCAAGCAGACGCTGTTCCGCCGCGCGGCCGTCCGCCTGA

>IST439\_01737 group 1 glycosyl transferase

ATGTCCGCCACCTCCCCGCTGCGCATCGCGCTCGTCTGCAACACGGCCTGGGCGATCCAT  
ACGTATCGCCACGGGCTGATCCGTGCGCTCGTCGCGCGCGGCCGCCGAGGTCGTGCTGATC  
GCGCCGCACGATCGCACCGTGCCGTTGCTCGAGCAGATGGGCTGCCGCTACGTGGCGCTC  
GCGGTCGCGTCGAAAGGCACGAGCCCGCGCGAGGATCTCGGCACGCTCGCCGCGCTGGTG  
CGCCACTATCGCGCGCTGCGGCCCGACCTCGTGTTCATTACACGATCAAGCCGAACATC  
TACGGCTCGGTGGCCGCGTGGCTCGCGCGCGTGCCGTCGATCGCGGTGACGACGGGCCTC  
GGCTACGTGTTTATCCAGAAGAGCCGCGCGGCGAGCGTCGCCAAGCGCCTGTACCGGTTT  
GCGTTCCGCTTCCCPCGTGAAGTGTGGTTTCTGAACCGCGACGATCTCGCGACCTTACC  
GACGAGCGCTTGCTCGCGCACCCCGATCGCGCACGGCTGCTGCACGGCGAAGGCGTCGAT

CTCGAACAGTTCGCGCCCCGTGCCGCTGCCCGCCGGCGACGCGCCCCGTGTTTCATCCTGATC  
 GGCCGGCTGCTGTGGGACAAGGGCGTGCGGAATACGTGGAGGCCGCGCGTCTCGTGCGC  
 GAGCGCTTCCCGAACGCGCGCTTCCAGTTGCTCGGGCCGCTCGGCGTCGACAATCCGAGC  
 GCGATCGGCCGCGCGGATGTGACGCGTGGGTCGACGAAGGCATCGTCGAATATCTCGGC  
 GAAGCGCACGACGTGCGACCGCACATCGCGGCGGGCCGACTGCGTCGTGCTGCCGTCGTAC  
 CGCGAAGGCGTGCCGCGCACGCTGATGGAAGCATCGGCGATGGGCCGCCGATCGTTCGCG  
 ACCGACGTGCCGGGCTGCCGCGACGTGTCGCCGACGGCGAAACAGGTTACCTGTGCCGT  
 GTGCGCGACAGCGCGAGCCTCGCGGAGCAATTGACTCGCATGATCGAACTCGGAACGGCC  
 GGACGCGAAGCGATGGGCGCGCGCGGCCGCGAGAAGGTCACGGCGGAATTCGACGAACAG  
 CAGGTCGTCGAACGCTACCGGCGTACCATCCACTCGTTAACCGGTATCACCCCTCTGA

>IST439\_01738 UDP-glucose 4-epimerase

ATGACCGCTAAAGGCACCATCCTCGTCACCGGCGGAGCCGGCTATATCGGCTCGCACACG  
 ACCGTCGAGCTGCTCGACAACGGCTACGACGTCGTGATCGTCGACAACCTCGTCAACAGC  
 AAGGCCGAATCGGTGCGCCGGATCGAGCGGATCACGGGCAAGACGCCCGCGTTCCACCAG  
 GTCGACGTGTGCGACGAAGCCGCGCTCGCGAAGGTGTTGACGCGCATCCGATCACGGGC  
 ACGATTCACTTCGCGGGCGCTCAAGGCCGTCGGCGAATCGGTTCGAGAAGCCGCTCGAGTAC  
 TACCAGAACAACATCGGCGGGGCTGCTCGCCGTGCTCAAGGTCATGCGCGAGCGCAACGTC  
 AGGCAGTTCGTGTTACGCTCGTCCGCGACCGTGTACGGCGTGCCCGAGCGCTCGCCGATC  
 GACGAATCGTTCGCGCTGTCCGCGACGAACCCGTACGGCCAGTCGAAGCTGATCGCCGAA  
 CAGATTCTGCGCGATCTCGAAGTCTCGGACCCGTCGTGGCGGATCGCGACGCTGCGCTAC  
 TTCAACCCGGTCGGCGCGCACGCGAGCGGGCTGATCGGCGAGGATCCGGCCGGCATCCCG  
 AACAACTGATGCCGTATGTGCGCAAGTCGCGGTCGGCAAGCTGGAAAAGCTGCGCGTG  
 TTCGGCTCGGACTACCCGACGCCGGACGGCACCCGGCGTGCGCGACTACATCCACGTCGTC  
 GATCTCGCGAAGGGGCACATCGCCGCACTCGACGCGCTCGCGAAGCGCGACGCGAGCTTC  
 GTCGTGAACCTCGGCACCGGGCAAGGCTACAGCGTGCTCGAAGTGGTGC GCGCGTTCGAG  
 AAGGCGTCGGGTCGTCCGGTGCCGTACGAACTCGTCGCGCGCCGCCCGGGCGACATCGCC  
 GAGTGCTATGCGAACCCGCAAGGCCGCGGCCGACATCATCGGCTGGCGCGCGACGCTCGGC  
 ATCGAGGAAATGTGTGCCGACCACTGGCGATGGCAGGAGGGGAACCCGCGCGGTTTTGTA  
 TAA

>IST439\_01739 glycosyl transferase family protein

ATGCTCAGCTTCGCGTCCGGCTTCATCGTCTCCCTGCTCGTCACGCTGTTTCATCGTGCGC  
 TACGCGACCTTCACGAGAAATTCTCGATCGACAGCGACCTGGCCGGCGTGCAGAAATTC  
 CATGTGCGGCCGGTGCCGCGGGTGGGCGGCATCGGGATCCTCGCCGGGGTCGTCGTTGCC  
 GCGCTGGTGCTGTTCCGGCGCTATCCGACGATCTCCGGCAGCATTCTCGGGATCGTTGCC

TGCGGGCTGCCGGCGTTCCTGTCCGGCCTCGTCGAGGATCTGACCAAGCGCGTATCGCCG  
CGTGCGCGGCTGCTCTGCACGATGGGCGCGGCCGCGCTCGCATTCTGGCTGATGCACATC  
GCGGTCACGCGCATCAGCGTGCCGCGGCTCGACTTCCCTGCTCGGCTACGTCGCCATTTCCG  
GCGTTCGTACCGTGCTCGCGGTCGCCGCGCTCGCGAATGCGATCAACATCATCGACGGC  
TTCAACGGGCTCGCGTCGATGGTCAGCTTCATGATGTTCCGCGTCGCTCGCGTATGTCCG  
TTCCACGTCAACGACCCGGTCGTGATGTCCGCGTCGATCATCATGATGGGGCGCCGTGCTC  
GGCTTCTTCCTGTGGAATTTCCCGGCCGGGCTGATCTTCCTCGGGCAGCGCGGCGCGTAT  
TTCATCGGCTTCATGCTCGCGAACTCGCGATCATGCTCGTGATGCGCAACCGCGAAGTG  
TCCGCGTGGTACCCGGTGCTGCTGTTTCATGTATCCGATCTTCGAGACCTGCTTCTCGATC  
TACCGGAAGAAGTTCATTCGCGGGATGTCCGACGGGATTCCGGACGGCGTGCACCTGCAC  
ATGCTCGTGTACAAGCGGCTGATGCGCTGGGCCGTCGGCACGAAGCATGCGCACGACCTG  
ACGCGGGCGCAATTCGCTGACTTCACCTTATCTGTGGCTGCTGTGCCTCGTCGCGGTGATA  
CCGGCGACGCTGTTCTGGCGGCATACGGTGCACCTGTTCCGCGTTCGTCGTGCTGTTCCG  
GTGACTTATGTGTGGCTGTACATCAGTATCGTGCGGTTCCGCGCACCGCGATGGATGGTC  
GTACGCAAGCATCGGCACAGCCGCTGA

>IST439\_01740 polysaccharide biosynthesis protein CapD

ATGTTGCAATCCAGAGCATCTTGGCTGTCCCTGAGTGCTTTCCTGTTTCGACCTGACGGCG  
GTTGTCGCCGCATGGTTGTTTCGCTATCTCGTTTCGTTTCAATGGCAGCGTTCGCGATGAT  
TTCCTGAGCGGGCGCGCTGATGGCGCTGACGTGGGTAAGTCCCGTCTACGCGCTGATGTTT  
CACGGGTTCCGGCCTATATCGCGGGGCTGTGGGTGTTTCGCGAGCCTGCCGGACCTAATGCGT  
ATCGCGAAAGCGGTGACCGGCGGGCGGCATGATCGTGATGATCGGCGCCGTGATGTTCCAG  
CCGGCACCGATCATCCCCGCTCAGTGCTGCTCGTGTCGCCGCTGATGCTGTTCCCTGGCG  
ATGGGTGGCGCGCGCGCTGTATCGCGCGACGAAGGAGTACTACCTGTACGGCGGACTC  
GTCGGCAAGGGCAAACCGGTGCTGGTGCTCGGCGCCGGCACGGCCGGCGCGAGCCTGGCA  
CGCGAACTGTCGCGCTCCGGTGAATGGCGCCTCGTGGGCCTGCTCGACGACGACGTCACG  
AAGCAGGGCCGTGAAATCTACGGCTACAAGGTGCTCGGCTCGTTCAACGACCTCAAGCAC  
TGGACCGATGCGATGAAGGTGCAATACGCGATCATCGCGATTCCGTCGGCATCGGTGCGAA  
ACGACGCGCCGTGTCGCGACCCTGTGCGTGCGGGCCGGCGTGAAGGCGATGGTGCTGCCT  
TCGCTGACCGCGCTGATGCCGGGGCAGGGCTTCCCTGTCGCGAGGTACGGAACATCGATCTC  
GAGGATCTGCTCGGCCGCGAGGCCGTGACGATCGATACGCCCCACGTCGAGGCGCTGCTG  
CGCGGCCGCGTCGTGATGGTGACGGGCGCGGGCGGCTCGATCGGCTCCGAGCTGTGCCGG  
CAGATCTTGCCTTCGCGCCTGCACAGCTCGTTGCGTTCGACCTCTCGGAATACGCGATG  
TACCGGCTGACCGAGGAGTTGCGCGAGCGGTTTCCGGATTTGCCCGTGGTGCCGATCATC  
GGAGACGCGAAAGATTCGCTGCTGCTCGATCAGGTGATGTCGCGCCATGCGCCGCACATC

GTGTTCCATGCGGCCGCCTACAAGCACGTGCCGTTGATGGAAGAGCACAAACGCATGGCAG  
 GCGCTGCGCAACAACGTGCTCGGCACCTATCGCGTGGCGCGGGCGGCGATCCGCCACGGC  
 GTGCGTCACTTCGTGCTGATCTCGACCGACAAGGCGGTCAATCCGACCAACGTGATGGGC  
 GCGAGCAAGCGTCTCGCCGAAATGGCCTGTCAGGCGTTACAGCAGACGAGCGGGCGCACC  
 CAGTTCGAGACGGTGCCTTCGGCAACGTGCTCGGCAGCGCGGGCAGCGTGATTCCGAAG  
 TTTCAGCAGCAGATCGCGAAGGGCGGCCCGGTACGGTACGCACCCGGAGATCACGCGT  
 TTCTTCATGACGATCCCGGAAGCGTCGCAGCTCGTGCTGCAGGCGTCGAGCATGGGGCAT  
 GGCGGCGAGATCTTCATTCTCGACATGGGCGAGCCGGTGAAGATCGTCGATCTCGCGTGC  
 GACCTGATCCGCCTGTACGGTTTCTCGGAAGAACAGATCCGGATCGAATTCACCGGGCTG  
 CGGCCGGGCGAGAAGCTTTACGAGGAACTGCTCGCGGACGACGAGGCGACGACGCGCACG  
 CCGCACCCGAAACTGCGGATCGCGCGGGCGCGCGAAGTGCCGGACAATTCCTCGACGAA  
 CTGCTGCCGTGGCTGATGCAGCATCGTGTGCTGCCCCGACGACGAAGTGCGGCGCGACCTG  
 CGGCGCTGGGTGCCTGAGTACCAGACGGCCACCGTGCCAGCCCTGAAGAGTGTGAGAGTC  
 GCATCGAACCGCTGA

>IST439\_01741 glycosyl transferase family protein

ATGCATTTCCCGATCTCCACTTGGCCTGCCGCGGTCCGGGTGGCGCTGGTCGCCGCCATC  
 GCATCGACGGCCATACTGCGCATGCTGCTCGCGACCGGCCTCGCATGGCGGCTCGCTACC  
 GATATTCGAACGACCGTTCGCTCCATAACGTTGCCGACGCCGCGTGTCCGGCGGATGGGGC  
 ATCGTGCCAGTGTCCGTTGCCACGCTGTTGATGCTGGCACCGCAACTGTGGCTGGTCGCA  
 GTCGCAGCAGCAGGGCTGGCCGCGATGTCGCAGATTGACGACCGGCGCGGGCTGCCGGCG  
 CGCGTGCGGTTCTCGGCGCACCTCGCGGCAGTCGTTGCGCTGATCGTTGTATTTCCAGCC  
 GACGCGCCCTGGTGGCTGCTCGCTGGCGTGGGTTTTCGCGATGGTCTGGCTGACGAACCTG  
 TACAACCTTCATGGACGGTGC GGATGGGCTTGCCGGAGGCATGGCGTTGTTCCGGCTTCGGC  
 GGGTATGCGGTTCGCGGCGCTCGGCGGCGCACAAAGAGTCGCCCGATCTCGTCGTTTCCGGA  
 GCGGCGGTCCCGGCGCGGGCGCTGGGCTTTCTTCTGCTCAATTTCCACCCGGCGAGACTA  
 TTCCTTGGCGACGCCGGCTCGATTCCGCTCGGCTTCCTGGCCGGTGCCTGGGCTACTGG  
 GGCTGGCGTACCGATGTCTGGCCGATCTGGTTTCCGGCCATGGTGTTCCTCGCCCTTTATT  
 CTCGATGCATCTGTAACACTTCTGAGACGCTTGTTACGCGGAGAAAAGTTCTGGCAGGCG  
 CATCGCGAGCATTATTATCAGAGGATGGTTCGATCGGGCGTCAGCCACGGTTCGGACCGCT  
 CTTTATTGGTACCTCATCATGCTCGCCGGCATAATTGTCGCCGTGTGGGCAAAGGGCCGC  
 CCTGAACCTGCAGCAATGGCTGTCGTTCTCGCGTGGTATGGCGTCTGGCATGGTTCCGGA  
 TGGTTGATCGACATGCGTTGGCGCCGGGTTCAAGTGGCTGCCGAAAACAATTCTTGA

>IST439\_01742 NAD-dependent epimerase/dehydratase

GTGAGTGATCTCGTCATCAGCGGCGCGAACGGCTTCGTTGGCCGAGCGGTCTGCCGTCGC



GCGCTGGAGGCCGGGCACACCGTCACGGCGCTGGTCCGGCGACCGGGCGGGTGCCTCGAT  
GGCGTACGCGAATGGGTGCATGACGCAGCCGATTTTCGACGGCCTTGATGCGCGATGGCCG  
GCCGACCTGGCAGCCGATTGCGTGATCCATCTCGCCGCTCGTGTGCATGTGATGCGCGAC  
GAGTCGCCCATCCCGATGCCGCGTTCGACGCTACCAATGTCGCCGGCACGCTGCGTCTC  
GCCGAGGCGTCGCGCAATCACGGCGTGCGCCGCTTCGTGTTTCGCGAGCAGCATCAAGGCT  
GTCGGCGAGGGCGATGGCGGTGTGCCGCTATCGGAAGCCGTCGAACCCGTTCCGCAGGAC  
GCGTACGGCCGCACCAAGCTACGCGCGGAGCGGCAACTCGCGCAATTCGGCGCGTCCGGCG  
GGGCTCGACGTCGTCGTCGTGCGTCCGCCGCTCGTGTACGGCCCCGGCCGTCCGTGCCAAC  
TTCCTGAGGATGATGGACGCGGTTCGCGCGCGGGGTGCCGTTGCCGTTCCGGCGCCGTTTCG  
GCGCGCCGCAGCGTTCGTCTACGTCGACAATCTCGCCGATGCGCTGCTGCGTTGCGCAATC  
GATCCACGCGCGGCCGGCGAGTGCTTTTCATATCGCCGACGACGACGCCCCGACGGTCGCG  
GACCTACTGCGCCTCGTCGGCGACGCGCTTGGCCGCCCGGGCGCGGCTAATTGCAGTACCT  
CCTGCACTACTGCGGGCGGCCGGGGCGCTGACAGGCCGCCGAGCGGTTATCGACCGCCTG  
ACAGGGAGCTTGCAGCTCGATAACCGACCGGATAAGGCGCGTACTCGACTGGCATCCGCCT  
TATACGACCCGCGAAGGCCTTGAAGCGACCGCCGCGTGGTATCGTTCGCGCGATAACAA  
CAATAG

>IST439\_01743 glycosyl transferase family protein

GTGCTTGACCGGATGAATGTAGCCTTCGACGTGATTACAGGCCACGGCAACGTCGGCTAT  
GGCCGCGGCCATAATCTCGCGATCGAGACGGTATGCAGCCGTTACCACCTCGTGCTGAAT  
CCCGACATCGATCTCGCGCCGAATGCGCTTGCGAACGCGCTTGATTTTCTCGATGCCCAT  
CCAGAGGCCGGCCTGCTGACGCCCTACATTGGCGACGAAGCCGGCCGCATCCAGTATCTG  
TGTCGTCGCTATCCCGCGATGCTCGATCTGTTTCGTGCGAGGTTTTCTGCCGTCGGTTTTT  
CACAAATCCTTCGAGCGCCGGCTGGCTCATTACGAAATGCGTGACGAGATCAACGACGCG  
GATATCGTCTGGGATCCACCGATCGTGAGCGGATGCTTTATGCTCTTCCGGACCGACCTG  
CTCAAGCGTCTGAATGGTTTTCGATCCACGGTATTTTCTGTACTTCGAAGACTACGATCTC  
AGCTTGCGGACCCGTGAGCTGGCGCGGATCGCATATGTGCCTGCGGTACGTGTGCTTAC  
CACGGCGGTGGTGTGCTGCCCGCAAGGGATGGGCCACATCCGGATGTTCCGCCGCTCGGCC  
TTCAAGTTCTACAACCGCTTCGGGTGGAGGCTGTGGTGA

>IST439\_01744 hypothetical protein

GTGGCCAACCCCGCCCCGCTCACCTCGGTTCGAAGGCGGACTGGCACACGGGAAGATGCAT  
GAAACTTGGCGGATGGCGCTCGCCGAGCAGGTGGATTTCGATTTGGAGCATGAAAGAGGTG  
CGAGAGTGCGAAACGGAAGTCACGAGTCAGGGCAGCACAATGGACGTCTATAACGACACG  
CCCCAGGTCGCGAGCGGCAACGGGCGGAATGGTATGGAGGCGATCACGCAGCTCTGTGAT  
ACCGAACGAGCGACAGGACCGTTCAGGGATCTGTGCTTACGCTATATCTATTTACACGC

CGACTTTATGACGCAGCACTGAAGGACGGTGTAAAGCGATCTGTTTTCTTCGCCAGAGAA  
GGACTTTTGCTGAAGCAAATGTTTCGACCGGGTGCAAGCCAATGAGGACAAGACACCCATA  
CGATCTCATTACCTAAAGGTGTCTCGTCGTTTCGACCTTTCTACTGTCACTGCGCCCGTTG  
GACCAGGAGCAGTTTGAAGTTCTCTTCCGACAGTACAGAAGGATCTCGATCGCCGAGTTT  
CTGAAGAGCCTAGCGCTGGAAGAATATCTTCTGACGTTTCGCTACCGAGCTTAACGTCGAA  
CCGTCGCTGCTGGCCGAGCGCAGTGCAGATTTGCCGCACGATCCACTTTTCGTCCGACTG  
CTGGACCTGCCGTCGTTTGCGCAAGTGTACGAGAAGGAGCGACTTGCGCGCAGCAAGGCG  
TTCGAAAATTACGTGGGCAGTTTCTGCAACGGCACCATCCCTGCGCGGTTGAGTGTGTT  
GACGTGGGATGGAAGGGGTCAATCCAGGACAACGTATTCGGATGGATGCGTAATCTCCGG  
GGAGACGCGGCAAGCGTCAAGGGCTACTACGTCGGCCTCATCGCAACCGGCAATGCCGGC  
CCCTCCAACGAGAAGGCAGGATTGTTATTTGAGAGCATCGGCGAGCGCACCGCGGGCTAC  
TACGTGTTCAACGAAAACCGGTCACTCTTTGAAGTCTTGCTGCATGCCAACACGGGTCG  
GCACAGCGCTATATTCAGACATCCGCGAACGAGGTCATCGTCGTAGAAGACTCGTTTGAA  
GAAGGTCCGATGATCGAAGCGTTTGTTAAACCGGTAGCCGATTGCATCATGGCCTCGTTC  
GTTTCGTATCGCGGACGCGATGGCTACGCTTGATGTGTCCGAGCAAGACCTTCTGGCCTGC  
GCAGTCAAACGCCATTCACGCATGGTGTTCGGCCTTCATCAAGCGAAATCGAATGGATG  
CGCTCACTGTGCGCACGTTGAAAATTTCCGGTGTCTTCGAGGCGTCGACGTTTCGACAATCGC  
CGGACCTCGCCTTCGTTGGGTTCCCGGCTAAGATTCTCGATCGATGTATTTCAGACACGGT  
CAACGCGACCTCGGTTTCTGGCCTTGGCTGACGATTGAAGAGCGCGCCCTCTGGGGAATG  
GCAGGTGTCTATCGGATCATTCGCATGTGGCAGAACCAACGGACCATGCGTCTGCACTCG  
AGCCCAACGGACAAAAGGCAGTACCTAAATGA

>IST439\_01745 group 1 glycosyl transferase

ATGAAAGTGTGTTTTCTTGTGGGGTCCATGGCGATCAGCGGTGGAACCTACGTCATTGTT  
CAGCACGCAAGCTATTTGCGTGACCACGGCTACGATGTCACTCTCGCCGTTCAAGAACCC  
TTCACGCCCGAGACGCTGGCGTGGCACAACGAGGCGCCTCGGCTGCGTTGCATTCCCATT  
GCGACGGCCCGTTCCGAGAAATACGACCTCGTGATCGCCACATGGTGGAAAACGGCGCTC  
GAGCTTCATGAATTCGATGCTGCCCGTTACGCGTACTTTGTCCAGTCGATCGAGTCCCGA  
TTCTATCCGGAAGCGGAGATCCCGTTACGCGCGCTCGTCGACGCGACCTACAAGCTCCCA  
GTGACTTATGTGACGGAAGCGACGTGGATCAAGGATTACTTGCAAAGCCATTTCCGGCAG  
GAAGCGTCACTGGTCAAGAACGGTATCCGGAAGGATGTCTATAACCCCGACCGGGCCAGCC  
GTCGAAGCAAGGAGTCCGACTCGTCTCCGCGTATTGGTAGAAGGACATTTCCGGAGTACCG  
TTCAAAAATACCGCGCTGGCAATTCGTCTCGCGAGGGAAGCAGGTGCAAGCGAAATCTGG  
CTGCTGACTGGCTACCCGTGCAATGGATTCCCGGTGTGTCCCGAGTATTTTCCCGAGTA  
CCTATGGTCAAGACGGCGGAAATCTATCGGTCTGTGACGTGCTACTGAAGCTGAGCAG

GTCGAAGGAATGTTTCGGACCGCCTCTTGAAATGTTCCACTGTGGCGGAACAGCAGTCGTC  
TTCGACGTCACCGGGCACGATGAATACATCGTCGACAACGAAAATTCGCGGGTAGTATCG  
ACAAACGATCTGGACGGAGTTGTGAAAACGATTTCGGACGCTCCTGAACGACCGAAGCGAA  
CTCGCTCGGCTTAAGGCAGGCGCCTTGCGCACAGCTCAAGCATGGCCCAATGGGAAGAC  
GCATCTGCGAAATTCTCAGACTGGATTCGCGATTGCTTGCAAGGGCCGGTCGTGAATCGA  
GATGAGTGTGCAGCAGTCATCGCAAAGGCCTGGAGCGACTATGACCGTGACGAAAAGCTG  
CGTCTCGCACAACTCGCCAGTCCGTCAGCCGCATGAGGCTGCGTGCGCTCGCCGGAAAA  
TTGCCAGGCTCGTGGACACGACGTCTCAAACAGCTCGAAGCAGTGAGCGAAGTGTGGTT  
GGCAAGCGTAAGGCCTATTGA

>IST439\_01746 HAD superfamily hydrolase-like protein

ATGTACAGACTGAAGACCATAGACGTGTGGGACACGCTGCTCCGGCGCGATTGCCACCCG  
GAATTTGCAAACTCGCAACGGCGTTGCACGTGTTTCTCGATCCGTCGATCGGTGTTTCC  
TGCCACTATGAAACGGCGTGGGACATCTATTGTCGGAGAGTCGAGCAAGAAATGCTGCTG  
GCCGATCGCGCGCGCAGCGGGAAAAGACAACGAGTACGAGATCGTCGAGGTAAGTGCAG  
CAATGGCTTACGCAGATCGTCGATCGACCCTACGACGACTCCCTGCCGTCCCGACTCGCC  
GATTTGAACTGGGCTTCGAACTTCGACACACCTATCCTGACCCAACGATCAGGGATGTA  
TCCGAGCAGTATCCTGCGGAAACGACGCTGTTTCTGTCGGACTTTTATATGTCCGCGGAT  
CGCCTTTCCACGCTGCTGCATCACCACGGAATCGACACGTTTGTGCCGGGAGGCTTGAGT  
TCCTGCGACGTCGGTATCAACAAACGCTCGGGCAAGTTTTTTTACTACGTCGAAGATCTC  
TATCGAGTAATGCCGAATGAGCATGTTACATCGGCGACAATTTGACGTCGGATCGCGAT  
GTGCCTCACGCGCTTGGTATCAATGCAGTCCATTTTCAACCGGAAGCAGAGCATGCGAAG  
CGACTGGCTCGCGAATCCGTCTTCGAGGATAGAGGGCAGTTGTTTCGCAAGATTCAGGCA  
GAAGTAAAGGTAGCAGCAAGTGGCTACCAATTTGCCCATGAGCAGTCCGCTGAACGCGAA  
GCCGCGTTCAGCGCAGGGATTCAGTCGAGCGTGCTGGTGATTGGCTTCTGTCTCTACGTT  
GCCGAAAATGTGCTGTCTGGTGGGCTCAAGAGTCTGTACTTCTTTTACGTCGAAAGCGAA  
TTCTTTGTACGTGTGTGGAATGCACTATTCCCGAGCGGACAGCATGCCGGTACACACTT  
CCGCACGCCTCTCTACTCGAAGTGAGTCGCCTTTCGACGTTCTGTGCGTCACTGCGGGAG  
GTCACCCCGTCAGAGATGCGCCGAATCTGGAATCTATATAACAACACATTCTCTCGAAGCA  
CTCTTGAAGTCGCTGGGGCTTGAACCTCGCTCGTTCGCGGAACTGGCAGCGAAGCATCAG  
TTGCCGTTGACTGAAACGATCCAGCATCCATGGGAAGACGGCCGTGTCAAACGCCTCTTC  
GACGATCCGCAGTTTGTTCATCAAATCACGGAGAAGATTCACGCCGATCGTCGTGCATTG  
CTAGCTTACTTGGCGACACAAGGGTTACGTGATGATGGATCGGTAGTGAGCGTCGTGAT  
ATTGGTTGGCGCGGCACCATTCAAGATAATCTTGCATGGCTTCTGCCCTCCGTACAATTC  
CAGGGGCAATATCTGGGATTGCAAATGTTTCTGAACGAGCAGCCTGCGAATACGCACAAG

CAAGCGTTCGGACCCAATGCAAATGAAACACTGGAACACTGCCATCTTCTCGACGCCGTG  
TCTCCGCTCGAGATGTTGTTTCAGTTCACCTCTCGGTTTCAGTATCCGGCTATCGCATGAAC  
GATGACGGCACCGGTGCAGTTGCATTTTCGCTCGGAAAGCGATATGGAACACGCTTCCAGC  
AAAAATTTTCGTCGAAAGCTTCCAGGATGGCGTGGTTGAAGCCGCGAAGGTGTGGGCCCGC  
TACGTCGAAACATGTGCGATTGCTGCGTCAGAACTTCGCGATCCGGCGTTGGCAACCTGG  
ACCAGGTTGATCGAACGTCCACACGAAACCTTGGTCGACGCATACTCGGCACTCAATCAG  
AATGACGTGTTCCGGTGCCGGTCAGTTCGTCAGCAAACGTGCCACCCCGGGAGTAGGCAAG  
TTGTTGTGGGGAATCGTTTTCGCGCGATGCGCGTCGGGAAGTGATCATGTACGTTTCGTCAA  
ACCCAATGGACCGCCGGAATCTGGGCGCGTCGCGACTTGACATTGGGAAATCGGCTGGCG  
CTAGTGATGGTGTTCGATTGGCCAAAGGCTACAAGCGATTTATGCAGCGAAGAACCGCC  
CAAATCGCACCCACAGTCGTCTAGCCAAGGAGCGGCCAGGGTCGTTCGGACGGTCGTACA  
TGA

>IST439\_01748 type 11 methyltransferase

ATGGAACGCATGCATTCGGATCATTTCAGATGCAGCACCTCGTATATGAGCATAACGCAT  
CGCTATCAATTGCTTTCGCGTATCGCTTACGGGCATGTCGTCGACTGCGCATGCGGTATC  
GGTTACGCATCTGAAATTATGGCGGCTGCCGGGTCGGTCTTACCACGGTTTCGATATT  
GATGAGCAGTCGGTTCAACTGGCGGTCCAACGATTTGCGGCTGACGGACGTCAGTTTACG  
GTCGGCTCGATTCTGTGCTGCCGCTTGAGGATGCGTCGGTTCGATACTTTCTTGTCGCTG  
GAAACACTTGAACATTTGCGGGAGCCTCAGCGCGCGATTACGAGATTACCCGTGTGCTG  
AAGGCGGACGGGATCTTCATGGGCTCGGTGCCGACGCGTTCTTACGATGAGCGTTGTCAC  
GAGGTTTACGGCCCGAACCCCTATCATGTGACGCGGTTTCGACGCAGACGAGATCGTTCAA  
CTGCTGCGAACC GGTTTGAGTACGTATGGCTTGGGGTCATCAGCCTCGACGTAGTGTCG  
ATCGTCCGGCCTGTGCCGGCCGCGAATGCAGGTCCAGCGGAATGGGTCGGCAACAGCAAG  
TGGGACGCGACAAAGTATGGTTCGTTTCATCTTCGTCGCGTCACATCAGCCTGTTGACGAA  
CTGGTCCGCAAGCTGCTTCCGCAGCAATGCGCGGTGCTGCATGGGTTGCCTACTGTTGAA  
GTGGACGCAGAGCAGACTATGCCGCTCTACAAGACAATCACGGAAATCGAGGGTCTTGTTG  
AGGGATCGCGACGCCGATTGGATCGATCGGAAGGAATGATCCGGGACCGCGACGCTGCG  
TTGCACCGGATGGAAGAGATGATTCGAGACCGCGACGCGGCAATTCGAAGCAATGAGCAG  
ATGATCAATGACCGTGACGCATTGATCGCGCAACTCGAACGAATGGTCGCTGACCGGGAC  
GCGGCGATCGCATCGAATGAGAAGTTGATCAACGAGCGCGACGCGTTGCTGCGAGCTAAA  
CGCACAGACTGA

>IST439\_01749 ABC transporter-like protein

ATGTCTCTAATGCGGTCATTTTCGGTTACCAGTCTTGGCAAGTGCTATCAGCTGTACGCG  
AAGCCGAGCGATCGCCTCAAGCAGATGCTCTTCGGGCGGTTTAAGCGCTATTACACGGAG

TTTTGGGCGCTGAGAGACGTGTCGTTTGACGTCCGTAAAGGTGAAACGATCGGCATCATC  
GGGCGGAATGGCGCCGGTAAGTCGACGCTCTTGACAGATGTTGTCAGGCGTGCTCCAACAA  
TCGACCGGGCAAAGCGAGGTGCGTGGTTCGCGTGTGTGCGCTGCTGGAACCTCGGCGCCGGT  
TTCAACCCTGAATTCACCGGGCGCGAGAACGCGATTCTGACCGGCGCAATTTATGGTATT  
CCTGGCGAGCAAATGGAAGCGAAGCTCCGGGAAATCGAAGCGTTCGCGGATATCGGTGAT  
CATATCGATCAGCCGGTCAAACATTATTCGAGCGGTATGTATGCGCGTCTTGCGTTCTCG  
GTCGCGATCCACGTTGATCCCAGATTCTGATCGTCGACGAGATACTTGCGGTGGGCGAT  
GCATTGTTCCAGCGCAAGTGCATGAACAAGTTCTACGAATTCGCGATCGTGGCTGCACG  
GTGCTCTTCGTGACTCATGATGCGTACCAGATCAAGAGTACGTGTCAACGAGCGTTGTAC  
TTGAAGAACGGCCGACAGGTGCGGTTCCGGCGATGCCACGGAAGTCGTGGATCGTTATCTG  
CAGGATCTCGAACTCATTGAGAGTAAGCCGGCTGATGTGGTACAACGGGGTGCGATCGCT  
GACGATGCGCCGAGTCCACGGCTGTAGCGCAGCCGGCAAACCTGATTCGGATCACGGAC  
GTGACGCTGACCGACGAATTTGGCTCGCCCATCACGCAGGTGCGAAGCGGTCAGACAATC  
GACATTCGTTTCCACTATCACGCGCCGCACAAACAGTCGATTCCGAAGGTATCGTTTGTG  
GTCAATCTCTATCGCCACGATTCGTTTTACATCTGTGGCACGACGACGATCATGGATGGT  
CTGGAGCCGTTTCGAACGGAGGATGAGGGCGAGGTGATTGTGCGCTTCCCTGATCTCAA  
CTTCTTGCGGGACGTTATATGTGGCGCGTTCGCGATCAACGACGAGCGAGGGCTTGGTATC  
CTGGCAGAGGCAACGCCGGTCTGCGGTTTTAGGTGGTCGACGATTTCCAGGCGGTTGGT  
CTCGTCAACGTGCCGCGGCAGTGGATCGTACACGGCCAGGAAGTAGAAAAGAGAGAACTT  
ATTCAAAGGTTTGA

>IST439\_01750 ABC-2 type transporter

ATGAGGATAATTTCTCCATCCTCCGGGGTGTCCGTTCCATCGTGTCTCATCGTACTTG  
CTCCGCCGCTCGTGTGGCGGGACATCCAGGGGCGCTATCGTGGATCTGCAGGTGGGCTC  
GGCTGGGCGATCGTTACGCCGCTCGTGCTGTTGAGCGTTTATACGTTTCGTCTTCAGCTTC  
GTGCTCAAGTCACGCTGGATCGGCGTGCCGAATCAGGATTCGCACGCTACGTACGCGATC  
ATGTGTTTTTCGGGGCTCATTGTGTACAGCGTATTTACAGAATGTATTTACGCGCGCCG  
ACGTTGATGACCGGCAACGTGAACTACGTGAAGAAGGTCGTGTTCCGCTGGAGATTCTT  
CCAATCGTGTGCTCGGAAGTGCCTGTTCCATTTTCGAATCGGCTTCACCGTGCTCCTG  
GTATTCATCGTGGTGTTCGGCTCGGGCCTGCCACCGACCGCTTGGGCGTTCTGGCTCGTG  
CTGCCGCCGCTCATGCTCTGGTGCATCGGTCTTGGATGGATCCTTTCGTCACCTCGGCGTG  
TTTCTGCGTGACCTGGGGCAACTCGTTACACTGGTGTGAGTGTGTTGATGTTTCGCTACG  
CCAATTTTCTATTCCGCCGATAGCCTGCCGGAGCAATATCGCATCTACATGGACCTCAAC  
CCGCTATCGTTTGTGATCGGGACATTGCGAGAAACCGTCATCCTGGGTCGATATCCCGAT  
CCGTCGTTCGATTGTCAGCATCTTCTTCCGGGCATCCTGGTGGCAGTTTTTGGCATGTGG

TGGTTCGAACGTACGCGTGGAGGGTTCGCCGATGTCCTCTAA

>IST439\_01751 dTDP-4-dehydrorhamnose reductase

ATGAGTGATTGCGGTGTGAGCGTACCGGAACAGCGGACGATTCTGCTTACCGGAGCGAAC  
GGGCAAGTGGGGTTTGAACCTTGCGCGAAGCCTGCAGGGATTGGGGCGCGTCATTGCCTGT  
GATCGCCGGCAGCTTGACCTGGCTGATCTTGACGGCATTTCGCGACGCCATGCGGGCACTG  
CGTCCGGCACTGGTCGTCAACGCGGCTGCGTACACAGCCGTCGCCGATGCAGAGCGGGAC  
GTGACCGGTAGCATGCGGATCAATGCCGACGCGCCGCGGGTGTGGCGGAAGAGGCGAAG  
CGTGTCGGTGCGGCGCTGGTCCATTATTCGACCGATTACGTATTTGACGGGCGAAAGATG  
GGCGCGTACGTCGAGGACGATGCGCCGGCCCCGCTGAACGCATACGGCCGTAGCAAGCTC  
GCAGGCGAGGAGGCGATTTCGGGGGACTGGCTGCGACCACCTGACTTTCCGTACGAGTTGG  
GTGTATGACCTGAGGTCCAACAATTTCTTGACGACGATGCTGCGCATCGGGGCCGAGCGT  
CCCGAGTTGCGTGTGGTCAGCGATCAGTTTGGCGCGCCGACGTGGTCTTACGCGATCGCC  
AGCCTCACGGCGCAGGTGCTTGCTCAGGCGATCGCAGCCGGCCGCATGCCGGAGCGATGG  
TCAGAGTGGTGGTCCACGCATACTGGTGTGTACCATCTGACCGCAATGGGCGAGACATCT  
TGGCACGGCTTCGCGGAAGCGATATTTGCTGCGTCCAATTGCACCAACAAGCCTTCGGTT  
ATTCCAATCGACGCTGCGTTCGTAACCGGGTCCCGTGCTCCGGCCGGCCAACTCGCTGCTG  
TCGAACGATAAGCTCGCATGTGCGTTTGGTTTACGTGCGCCGGACTGGCGCTTTTTGCTG  
AACCTTTGCCTGGCCGACGCGCACTCGAGTCGCGATGCCGAACGGAACCGGTTCGATTGCC  
TAA

>IST439\_01752 dTDP-4-dehydrorhamnose 3,5-epimerase

ATGGCCATCCAGGTAACAGCAACGGCATTGCCGGAAGTCAAGATCATCGAGCCAAAGGTA  
TTCGGCGACGCGCGCGGCTACTTCTACGAGAGCTTCAATGCCCAGGAGTTCGCCGAACAG  
GTCGCGCCGGGCGTTCGAGTTCGTACAGGACAATCACTCGCGCTCGATGCGCGGCGTGCTG  
CGCGGGCTGCACTACCAGATTCAGCATGCGCAGGGAAAGCTGGTGCGCGTGGTTCGAGGGC  
GAGGTGTTTCGATGTCGCGGTTCGATGTACGTCGCAGCTCGCCGAACCTTCGGCAAATGGGTC  
GGCGTCCGTCTGTGCGCCCGCGATCATCGGCAGCTATGGGTCCCGCCGGGCTTCGCGCAC  
GGGTTCGTTGTGCTGTCTGACATTGCCAGTTTCTGTACAAGACAAGCGACTATTGGTTT  
CCGCAGCACGAACGGAGCCTGCTGTGGAATGATCCGGCGATCGGGATCGATTGGCAGATA  
GACACGTTGCCGACCCTGGCAGCCAAGGATGCGGCCGGGAAGCGGTTGTCCGAGGCGGAA  
TGTTATGAGTGA

>IST439\_01753 glucose-1-phosphate thymidyltransferase

ATGGCACGTAAAGGCATTATCCTTGCCGGCGGTTTCGGGCACACGGCTGTATCCGATTACG  
CATGTCGTATCGAAGCAGCTGCTGCCGGTGTACGACAAACCGATGATTTACTACCCGCTG  
TCGACGCTGATGGTGGCGGGCATCCGGGACGTGCTGATCATCTCGACGCCGCACGACACG

CCGCGCTTCGGAGCGATGCTGGGCGACGGCAGTCAGTGGGGCATGAATATCCAGTTCGCG  
GTGCAGCCGTCGCCGACGGGCTCGCGCAGGCCTTCATCATCGGGAAGTCGTTTCATCGGC  
AACGAGCCGTCGGCCCTGATTCTCGGCGACAACATCTTCTACGGACACGACCTCGCGAAG  
CAACTCGAACGGGCCGATGCGAATACGAATGGCGCAACGGTGTTCGCGTATCACGTTTCAG  
GATCCCAGCGGTACGGCGTGGTTCGAATTCGACCGGGATTTCCGTGCGTTGTTCGATCGAG  
GAAAAGCCGGTCAAGCCGCGTTCGCACTACGCGGTGACGGGCCTGTACTTCTACGACAAC  
CGCGTGTGCGATATCGCGTCCGACATCAAGCCGTCCGCGCGGGCGAGCTCGAGATCACC  
GACGTGAACTCGCGCTATCTGGCCGACGGTGCCTCGATGTCGAGATCATGGGGCGGGGC  
TATGCGTGGCTCGATACGGGTACGCATGATTCGCTGATCGATGCGGCAATGTTTCATCGCG  
ACGCTGCAGAAGCGCCAGGGGCTCGTCGTGGCGTGCCCGAAGAGATCGCCTACCGCAAG  
CGGTGGATCGACGCCGAGCAGTTGGGCAAGCTCGCCGCACCGCTGTGCGAAAACAGTTAC  
GGGCGATATCTCCAACATATTCTTTCTGACCAAGTCGCATGGCCATCCAGGTAA

>IST439\_01754 dTDP-glucose 4,6-dehydratase

ATGATCCTGGTTACCGGCGGCGCGGGTTTTATCGGTGCCAATTTTCGTA CTGACTCGACTGGATG  
GATGCTTCCGGCGAGGCCGTGCTCAATGTTCGACAAGCTGACCTATGCGGGCAACCTGCGG  
ACGCTGGTCCCCTGGACGGGAATCCGGCCCATGTGTTTCGCCCGTGTTCGACATCTGCGAT  
CGCGCGGCACTCGATGCGCTGTTTGCCGAGCACAAGCCGCGCGCCGTGATCCACTTCGCC  
GCCGAAAGCCATGTTCGACCGTTCGATCCACGGACCGGCCGATTTTCGTGCAGACTAACGTC  
GTCGGTACGTTTACGCTGCTCGAAGCGGCACGTACGCACTGGAATAGCCTGAACGATACG  
GACAAGGCGGCCTTCCGCTTCCCTGCACGTGTCGACCGACGAGGTGTTTCGGATCGCTGTCG  
GCCACCGACCCGCAATTCTGCGAGACGACTCCGTACGCGCCGAACAGCCCGTATTCGGCG  
ACGAAGGCCGGCTCTGATCATCTGGTGCCTGCGTATCACCATACGTACGGCCTGCCGACT  
CTCACGACGAATTGCTCGAACAACACTACGGCCCGTACCAGTTCCCCGAGAACTGATTCCG  
CTGATGATCGCGAACGCGCTCGCGGGCAAGCCGCTGCCGGTCTACGGCGACGGCCAGAAC  
GTGCGCGACTGGCTGTACGTTCGGCGACCACTGCAGCGCGATCCGCGAAGTGCTCGCGCGC  
GGCGTGCCGGGCGAGACGTACAACATCGGTGGCTGGAACGAGAAGAAGAATCTCGACGTC  
GTGCATACGCTGTGCGATCTGCTCGACGCGGCGCGGCCGAAGGCGGGCCGGTTTCGTACCGC  
GAGCAGATCACCTACGTGAAGGACCGTCCGGGCCACGACCGCCGCTACGCGATCGATGCG  
CGCAAGCTCGAGCGCGAACTCGGCTGGAAGCCCGCCGAGACGTTTCGAGACGGGGCTCGCG  
AAAACCGTGCCTGGTATCTCGACAATCAGGCGTGGGTGGACGACGTCGCGTTCGGGCGAT  
TATCGCAAGTGGGTGCGAAACCAATTACGCGCAACGCACGTGA
