# Supplementary material for: Structure of O-Antigen and Hybrid Biosynthetic Locus in Burkholderia cenocepacia Clonal Variants Recovered from a Cystic Fibrosis Patient
Source: PubMed Central journal article supplement (PMC5462993; doi:10.3389/fmicb.2017.01027), 2017-06-08
Supplement: Table_2.pdf [file Table_2.pdf]

*Supplementary Material*

**Structure of O-antigen and hybrid biosynthetic locus in *Burkholderia cenocepacia* clonal variants recovered from a cystic fibrosis patient**

**A. Amir Hassan<sup>1§</sup>, Rita F. Maldonado<sup>1§</sup>, Sandra C. dos Santos<sup>1§</sup>, Flaviana Di Lorenzo<sup>2§</sup>, Alba Silipo<sup>2</sup>, Carla P. Coutinho<sup>1</sup>, Vaughn S. Cooper<sup>4</sup>, Antonio Molinaro<sup>2</sup>, Miguel Valvano<sup>3</sup> and Isabel Sá-Correia<sup>1\*</sup>**

\* **Correspondence:** Professor Isabel Sá-Correia: [isacorreia@tecnico.ulisboa.pt](mailto:isacorreia@tecnico.ulisboa.pt)

§ These authors contributed equally to this work

## 1 Supplementary Tables:

**Table S2:** Primer sequences used to amplify the desired regions with detailed description

| Primers             | Primer Sequences                                                    | Description                                                                                                                                            |
|---------------------|---------------------------------------------------------------------|--------------------------------------------------------------------------------------------------------------------------------------------------------|
| primer 824          | 5'-GCCCATTTTCCTGTCAGTAACGAGA-3'                                     | Screening of the transformants                                                                                                                         |
| pSC rev             | 5'-GATGCCTGGCAGTTCCTACTCTCG-3'                                      |                                                                                                                                                        |
| WbiI-flag-NdeI      | 5'-GCTACATATGGACTACAAGGACGACGACGACAAGTTGCAATCCAGAGCATCTTGGCT-3'     | Cloning of <i>wbiI</i> with an N-terminal FLAG epitope incorporated to the expressed protein                                                           |
| WbiI_439_XbaI       | 5'-TAGCATCTAGATCAGCGTTTCGATGCGACTCTCAC-3'                           |                                                                                                                                                        |
| wbiI 439 NdeI       | 5'-ACGCTCATATGTTGCAATCCAGAGCATCTTGGCTG-3'                           | Cloning of <i>wbiI</i> with a C-terminal FLAG epitope incorporated to the expressed protein                                                            |
| WbiI-flag-XbaI      | 5'-CGTTCTAGATCACTTGTCTGTCGTCGTCGTCCTTGTAGTCGCGTTTCGATGCGACTCTCAC-3' |                                                                                                                                                        |
| Bmul_2510-439-NdeI  | 5'-AAGGCCTACATATGTACAGACTGAAGACCA-3'                                | Cloning of <i>bmul_2510</i> with a C-terminal FLAG epitope incorporated to the expressed protein                                                       |
| Bmul_2510-flag-XbaI | 5'-CGTTCTAGATCACTTGTCTGTCGTCGTCGTCCTTGTAGTCTGTACGACCGTCCGACGACCC-3' |                                                                                                                                                        |
| Primer P1           | 5'-TGAAATTCAGCAGGATCACAACGCTCATATGTTGCAATC-3'                       | Cloning of both <i>wbiI</i> and <i>bmul_2510</i> with a C-terminal FLAG epitope incorporated to the expressed protein using the Gibson assembly method |
| Primer P2           | 5'-GCGACCTCCTCGTTCTAGATCACTTGTCTG-3'                                |                                                                                                                                                        |
| Primer P3           | 5'-ATCTAGAACGAGGAGGTCGCGCTCATATGTACAGACTGAAGACC-3'                  |                                                                                                                                                        |
| Primer P3           | 5'-GATCCCCGGGTACCATGGCACGTTCTAGATCACTTGTCTG-3'                      |                                                                                                                                                        |
