# Supplementary material for: Structure of O-Antigen and Hybrid Biosynthetic Locus in Burkholderia cenocepacia Clonal Variants Recovered from a Cystic Fibrosis Patient
Source: PubMed Central journal article supplement (PMC5462993; doi:10.3389/fmicb.2017.01027), 2017-06-08
Supplement: Table_3.pdf [file Table_3.pdf]

*Supplementary Material*

**Structure of O-antigen and hybrid biosynthetic locus in *Burkholderia cenocepacia* clonal variants recovered from a cystic fibrosis patient**

**A. Amir Hassan<sup>1§</sup>, Rita F. Maldonado<sup>1§</sup>, Sandra C. dos Santos<sup>1§</sup>, Flaviana Di Lorenzo<sup>2§</sup>, Alba Silipo<sup>2</sup>, Carla P. Coutinho<sup>1</sup>, Vaughn S. Cooper<sup>4</sup>, Antonio Molinaro<sup>2</sup>, Miguel Valvano<sup>3</sup> and Isabel Sá-Correia<sup>1\*</sup>**

\* **Correspondence:** Professor Isabel Sá-Correia: [isacorreia@tecnico.ulisboa.pt](mailto:isacorreia@tecnico.ulisboa.pt)

§ These authors contributed equally to this work

**1 Supplementary Tables:**

**Table S3:** Monosaccharide compositional analysis of the LPS/LOS isolated from *B. cenocepacia* isolates IST4113, IST4129, IST4134 and IST439.

| Strains                   | Monosaccharide composition                                          |
|---------------------------|---------------------------------------------------------------------|
| IST4113, IST4129, IST4134 | 4-amino-4-deoxy-L-arabinose (L-Ara4N)                               |
|                           | D-glucose (D-Glc)                                                   |
|                           | D-galactose (D-Gal)                                                 |
|                           | D-glucosamine (D-GlcN)                                              |
|                           | L- <i>glycero</i> -D- <i>manno</i> -heptose (L,D-Hep)               |
|                           | 3-deoxy-D- <i>manno</i> -oct-2-ulopyranosonic acid (D-Kdo)          |
|                           | D- <i>glycero</i> -D- <i>talo</i> -oct-2-ulopyranosonic acid (D-Ko) |
|                           |                                                                     |
| IST439                    | 4-amino-4-deoxy-L-arabinose (L-Ara4N)                               |
|                           | D-glucose (D-Glc)                                                   |
|                           | D-galactose (D-Gal)                                                 |
|                           | L- <i>glycero</i> -D- <i>manno</i> -heptose (L,D-Hep)               |
|                           | 3-deoxy-D- <i>manno</i> -oct-2-ulopyranosonic acid (D-Kdo)          |
|                           | D- <i>glycero</i> -D- <i>talo</i> -oct-2-ulopyranosonic acid (D-Ko) |
|                           | 4-amino-4-deoxy-L-arabinose (L-Ara4N)                               |
|                           | D-glucose (D-Glc)                                                   |
|                           | D-glucosamine (D-GlcN)                                              |
|                           | D-ribose (D-Rib)                                                    |
|                           | D-galactosamine (D-GalN)                                            |
|                           |                                                                     |
